# Supplementary material
Source: MDPI journal article supplement (https://www.mdpi.com/2073-4395/13/10/2540)

**Table S1.** Weather data during the cropping period of spring barley from 1990 to 2020 recorded at the Normandin and the Saint-Prime weather station of Environment Canada, the closest of the studied field experiment.

| Year    | Precipitations [mm]          |        | Mean temperature [°C]     |        | GDD*<br>[°C-d]            | Sum<br>Radiation<br>[MJ m <sup>-2</sup> ] |
|---------|------------------------------|--------|---------------------------|--------|---------------------------|-------------------------------------------|
|         | From early May to<br>harvest | Annual | From sowing to<br>harvest | Annual | From sowing to<br>harvest |                                           |
| 1990    | 338                          | 858    | 15.8                      | 3.0    | 1641                      | 1912                                      |
| 1991    | 245                          | 717    | 17.0                      | 2.6    | 1597                      | 1931                                      |
| 1992    | 402                          | 839    | 14.9                      | 1.5    | 1699                      | 1944                                      |
| 1993    | 387                          | 867    | 17.0                      | 1.9    | 1715                      | 1845                                      |
| 1994    | 371                          | 814    | 16.1                      | 2.1    | 1639                      | 1960                                      |
| 1995    | 230                          | 790    | 18.4                      | 2.9    | 1492                      | 1866                                      |
| 1996    | 379                          | 1134   | 16.4                      | 2.9    | 1607                      | 1921                                      |
| 1997    | 315                          | 733    | 15.4                      | 1.9    | 1744                      | 2067                                      |
| 1998    | 310                          | 732    | 15.4                      | 3.4    | 1775                      | 2166                                      |
| 1999    | 371                          | 875    | 15.7                      | 2.7    | 1510                      | 1840                                      |
| 2000    | 260                          | 702    | 14.4                      | 1.5    | 1456                      | 1840                                      |
| 2001    | 325                          | 832    | 16.1                      | 2.6    | 1605                      | 1828                                      |
| 2002    | 263                          | 779    | 15.8                      | 0.9    | 1553                      | 1928                                      |
| 2003    | 262                          | 805    | 16.1                      | 1.3    | 1597                      | 1819                                      |
| 2004    | 311                          | 785    | 14.3                      | 0.1    | 1497                      | 1804                                      |
| 2005    | 176                          | 702    | 16.3                      | 2.0    | 1431                      | 1821                                      |
| 2006    | 297                          | 1033   | 16.0                      | 2.8    | 1555                      | 1839                                      |
| 2007    | 292                          | 697    | 14.3                      | 1.4    | 1635                      | 2259                                      |
| 2008    | 324                          | 800    | 15.5                      | 1.2    | 1438                      | 1543                                      |
| 2009    | 311                          | 683    | 14.8                      | 1.2    | 1674                      | 2008                                      |
| 2010    | 179                          | 758    | 16.4                      | 3.8    | 1550                      | 1891                                      |
| 2011    | 402                          | 890    | 16.4                      | 2.4    | 1540                      | 1859                                      |
| 2012    | 298                          | 804    | 16.4                      | 3.1    | 1609                      | 1989                                      |
| 2013    | 296                          | 965    | 16.1                      | 1.9    | 1463                      | 1813                                      |
| 2014    | 340                          | 982    | 16.9                      | 1.4    | 1610                      | 1895                                      |
| 2015    | 349                          | 958    | 16.0                      | 1.7    | 1644                      | 1910                                      |
| 2016    | 417                          | 1291   | 16.3                      | 2.0    | 1598                      | 1854                                      |
| 2017    | 498                          | 1117   | 14.9                      | 1.6    | 1687                      | 2157                                      |
| 2018    | 269                          | 843    | 17.4                      | 1.6    | 1722                      | 1962                                      |
| 2019    | 249                          | 742    | 15.8                      | 0.7    | 1591                      | 1980                                      |
| 2020    | 355                          | 838    | 18.1                      | 2.8    | 1663                      | 1823                                      |
| Average | 317                          | 850    | 16.0                      | 2.0    | 1598                      | 1912                                      |

\*Sum of growing degree-days on 0°C basis

**Table S2.** Key cropping practices (date of N application, seeding, harvest, and soil tillage) and measurements at harvest of the ‘Chapais’ (1990-2014) and ‘Alyssa’ (2015-2020) spring barley cultivars.

| <b>Year</b> | <b>Fertilization date</b> | <b>Seeding date</b> | <b>Harvest date</b> | <b>Fall tillage date</b> | <b>N total LDM<br/>[kg N ha<sup>-1</sup>]</b> |
|-------------|---------------------------|---------------------|---------------------|--------------------------|-----------------------------------------------|
| 1990        | 8/05                      | 9/05                | 20/08               | 21/09                    | 73                                            |
| 1991        | 20/05                     | 21/05               | 22/08               | 16/10                    | 121                                           |
| 1992        | 23/05                     | 25/05               | 15/09               | 15/10                    | 79                                            |
| 1993        | 30/05                     | 30/05               | 7/09                | 13/10                    | 90                                            |
| 1994        | 20/05                     | 20/05               | 29/08               | 27/09                    | 89                                            |
| 1995        | 26/05                     | 26/05               | 14/08               | 28/09                    | 77                                            |
| 1996        | 17/05                     | 17/05               | 22/08               | 25/09                    | 75                                            |
| 1997        | 15/05                     | 15/05               | 4/09                | 25/09                    | 110                                           |
| 1998        | 11/05                     | 12/05               | 3/09                | 25/09                    | 79                                            |
| 1999        | 16/05                     | 17/05               | 20/08               | 25/09                    | 79                                            |
| 2000        | 23/05                     | 23/05               | 31/08               | 25/09                    | 110                                           |
| 2001        | 22/05                     | 23/05               | 30/08               | 25/09                    | 141                                           |
| 2002        | 28/05                     | 29/05               | 3/09                | 25/09                    | 105                                           |
| 2003        | 26/05                     | 27/05               | 2/09                | 17/09                    | 115                                           |
| 2004        | 27/05                     | 27/05               | 8/09                | 22/10                    | 105                                           |
| 2005        | 19/05                     | 20/05               | 15/08               | 20/09                    | 120                                           |
| 2006        | 19/05                     | 19/05               | 23/08               | 12/09                    | 120                                           |
| 2007        | 14/05                     | 14/05               | 4/09                | 24/09                    | 142                                           |
| 2008        | 19/05                     | 20/05               | 20/08               | 18/09                    | 75                                            |
| 2009        | 21/05                     | 21/05               | 10/09               | 24/09                    | 153                                           |
| 2010        | 20/05                     | 21/05               | 23/08               | 4/10                     | 87                                            |
| 2011        | 25/05                     | 25/05               | 26/08               | 28/09                    | 103                                           |
| 2012        | 14/05                     | 15/05               | 20/08               | 27/09                    | 134                                           |
| 2013        | 27/05                     | 28/05               | 26/08               | 16/10                    | 138                                           |
| 2014        | 27/05                     | 27/05               | 29/08               | 15/10                    | 123                                           |
| 2015        | 21/05                     | 22/05               | 1/09                | 28/09                    | 134                                           |
| 2016        | 26/05                     | 26/05               | 31/08               | 5/10                     | 84                                            |
| 2017        | 31/05                     | 31/05               | 20/09               | 4/10                     | 118                                           |
| 2018        | 28/05                     | 29/05               | 4/09                | 1/10                     | 138                                           |
| 2019        | 28/05                     | 28/05               | 5/09                | 2/10                     | 85                                            |
| 2020        | 22/05                     | 25/05               | 24/08               | 24/09                    | 110                                           |

**Table S3.** Performance of STICS with defaults parameters (Scarlett cultivar) and newly calibrated parameters to predict spring barley aboveground biomass (AGB), grain yield (GY), N concentration in AGB (NCAGB) and in grain (NCG), plant shoot N uptake (NU) and N amount in grain (NAG).

| Variables                                                         | n  | Mean Obs  | Mean Pred  | NME (%) | NRMSE (%) | EF    |
|-------------------------------------------------------------------|----|-----------|------------|---------|-----------|-------|
| <b><u>With defaults parameters (Scarlett cultivar)</u></b>        |    |           |            |         |           |       |
| AGB (Mg DM ha <sup>-1</sup> )                                     | 28 | 4.5(0.8)  | 6.4(1.0)   | -42     | 50        | -7.9  |
| GY (Mg DM ha <sup>-1</sup> )                                      | 28 | 2.8(0.6)  | 2.4(0.7)   | 16      | 29        | -0.8  |
| NCAGB (g kg <sup>-1</sup> DM)                                     | 28 | 16(2)     | 9(1)       | 47      | 48        | -14.4 |
| NCG (g kg <sup>-1</sup> DM)                                       | 28 | 19(3)     | 12(2)      | 38      | 41        | -7.2  |
| NU (kg N ha <sup>-1</sup> )                                       | 28 | 71.8(9.3) | 55.2(12.3) | 23      | 32        | -5.2  |
| NAG (kg N ha <sup>-1</sup> )                                      | 28 | 54.3(9.1) | 44.2(16.3) | 19      | 39        | -4.7  |
| <b><u>With newly calibrated parameters (Chapais cultivar)</u></b> |    |           |            |         |           |       |
| AGB (Mg DM ha <sup>-1</sup> )                                     | 28 | 4.5(0.8)  | 4.4(0.3)   | 3       | 14        | 0.3   |
| GY (Mg DM ha <sup>-1</sup> )                                      | 28 | 2.8(0.6)  | 2.8(0.2)   | 0       | 16        | 0.4   |
| NCAGB (g kg <sup>-1</sup> DM)                                     | 28 | 16(2)     | 16(2)      | 0       | 6         | 0.8   |
| NCG (g kg <sup>-1</sup> DM)                                       | 28 | 19(3)     | 20(2)      | -4      | 9         | 0.6   |
| NU (kg N ha <sup>-1</sup> )                                       | 28 | 71.8(9.3) | 70.4(4.4)  | 2       | 13        | 0.0   |
| NAG (kg N ha <sup>-1</sup> )                                      | 28 | 54.3(9.1) | 56.1(3.5)  | -3      | 17        | -0.1  |

n: Number of predicted/observed data pairs, Mean Obs: mean of observed values, Mean Pred: mean of predicted values, NME; normalized mean error, NRMSE: normalized root mean square error, EF: model efficiency

**Table S4.** Mean of field-observed and STICS-predicted values for aboveground biomass (AGB), grain yield (GY), N concentration in aboveground biomass (NCAGB) and in grain (NCG), N uptake by plant (NU), and N amount in grain (NAG) as affected by N source type and tillage system. LDM: liquid dairy manure; MIN: ammonium nitrate; MP: moldboard plow; CP: chisel plow.

| Source                                | AGB<br>(Mg DM ha <sup>-1</sup> ) | GY<br>(Mg DM ha <sup>-1</sup> ) | NCAGB<br>(g kg <sup>-1</sup> DM) | NCG<br>(g kg <sup>-1</sup> DM) | NU<br>(kg N ha <sup>-1</sup> ) | NAG<br>(kg N ha <sup>-1</sup> ) |
|---------------------------------------|----------------------------------|---------------------------------|----------------------------------|--------------------------------|--------------------------------|---------------------------------|
| <b>Mean of field-observed values</b>  |                                  |                                 |                                  |                                |                                |                                 |
| <b><u>N source type</u></b>           |                                  |                                 |                                  |                                |                                |                                 |
| MIN                                   | 4.7                              | 3.0                             | 16.1                             | 19.8                           | 73.2                           | 57.1                            |
| LDM                                   | 3.9                              | 2.4                             | 16.6                             | 20.2                           | 62.0                           | 45.7                            |
| <b><u>Tillage system</u></b>          |                                  |                                 |                                  |                                |                                |                                 |
| MP                                    | 4.3                              | 2.8                             | 16.6                             | 20.1                           | 67.2                           | 52.2                            |
| CP                                    | 4.3                              | 2.6                             | 16.2                             | 20.0                           | 68.0                           | 50.6                            |
| <b>Mean of STICS-predicted values</b> |                                  |                                 |                                  |                                |                                |                                 |
| <b><u>N source type</u></b>           |                                  |                                 |                                  |                                |                                |                                 |
| MIN                                   | 4.5                              | 2.9                             | 16.1                             | 19.8                           | 72.1                           | 57.4                            |
| LDM                                   | 4.1                              | 2.6                             | 16.9                             | 20.8                           | 69.8                           | 55.6                            |
| <b><u>Tillage system</u></b>          |                                  |                                 |                                  |                                |                                |                                 |
| MP                                    | 4.3                              | 2.8                             | 16.5                             | 20.3                           | 71.2                           | 56.7                            |
| CP                                    | 4.3                              | 2.8                             | 16.4                             | 20.3                           | 70.7                           | 56.3                            |

**Figure S1.** Aboveground biomass (AGB), grain yield (GY), N concentration in aboveground biomass (NCAGB), N uptake by plant (NU), and N amount in grain (NAG) as affected by N source type (a, b, c, d, e) or tillage system (f, g, h, i, j). Dots represent the means. Bars on dots are standard error of the mean (n=4). LDM: liquid dairy manure; MIN: ammonium nitrate; MP: moldboard plow; CP: chisel plow.

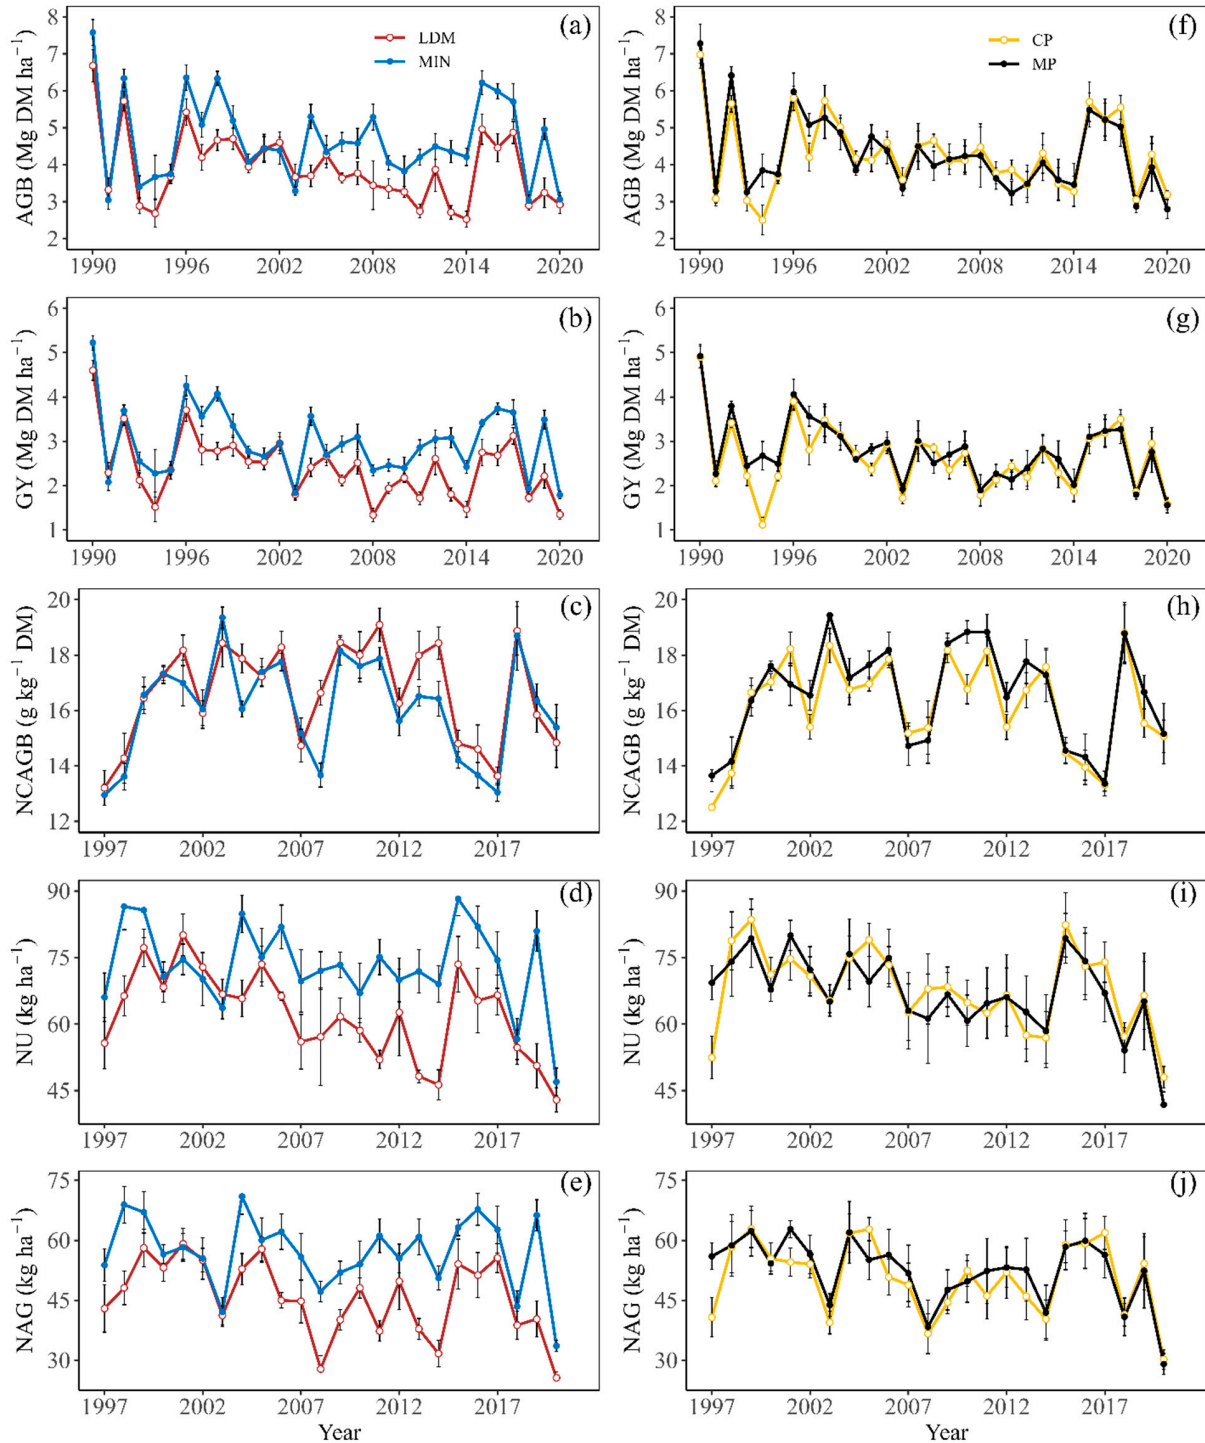

**Figure S2.** Scatterplots showing the trend in field-observed spring barley AGB and GY as a function of N source type (a, b), and tillage system (c, d) between 1993 and 2020. LDM: liquid dairy manure; MIN: ammonium nitrate.

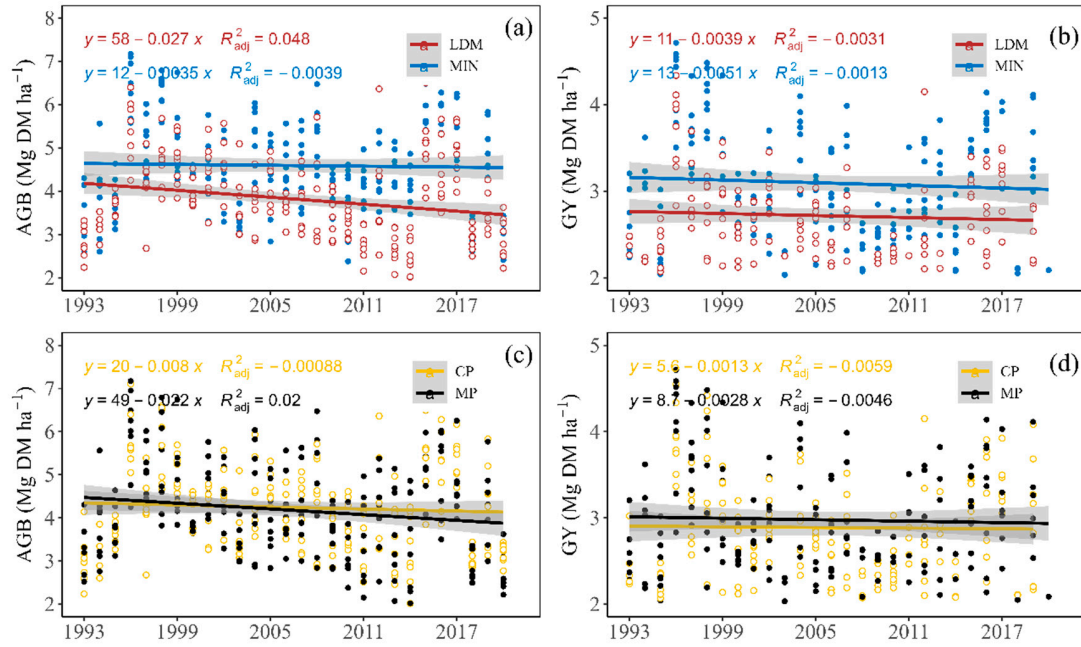

**Figure S3.** STICS-predicted soil mineral N content ( $\text{kg ha}^{-1}$ ) down to 100 cm depth over 31 years according to management system. LDM: liquid dairy manure; MIN: ammonium nitrate; MP: moldboard plow; CP: chisel plow

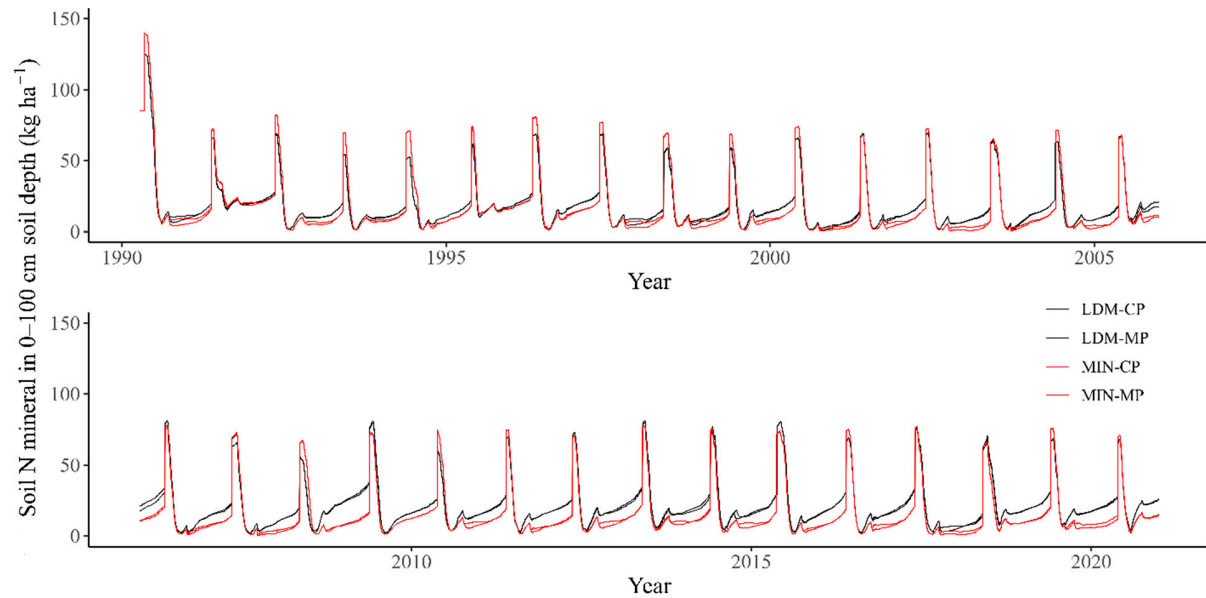

Supplement: s1 [file s1]
